# Supplementary material for: A long noncoding RNA distributed in both nucleus and cytoplasm operates in the PYCARD-regulated apoptosis by coordinating the epigenetic and translational regulation
Source: PLoS Genet. 2019 May 14;15(5):e1008144. doi: 10.1371/journal.pgen.1008144 (PMC6534332; doi:10.1371/journal.pgen.1008144)
Supplement: S7 Data — (XLSX) [file pgen.1008144.s014.xlsx]

## Sheet: Figure S1G
	Percentage of transcript abundance
			Experiment 1	Experiment 2	Experiment 3
	XIST	Chromatin	79.7333	80.1615	91.3348
		Nucleoplasm	10.5231	18.8243	19.423
	GAPDH	Chromatin	4.8641	2.4649	5.02034
		Nucleoplasm	99.5351	99.8075	88.3081
	PYCARD-AS1	Chromatin	22.7434	23.3812	31.6456
		Nucleoplasm	64.8021	86.9516	70.4615
